# Supplementary material for: Cryo-EM structure of the dimeric Rhodobacter sphaeroides RC-LH1 core complex at 2.9 Å: the structural basis for dimerisation
Source: PubMed Central journal article supplement (PMC8652583; doi:10.1042/bcj20210696), 2021-11-09
Supplement: BCJ-478-3923-s1.pdf [file BCJ-478-3923-s1.pdf]

## Supplementary material

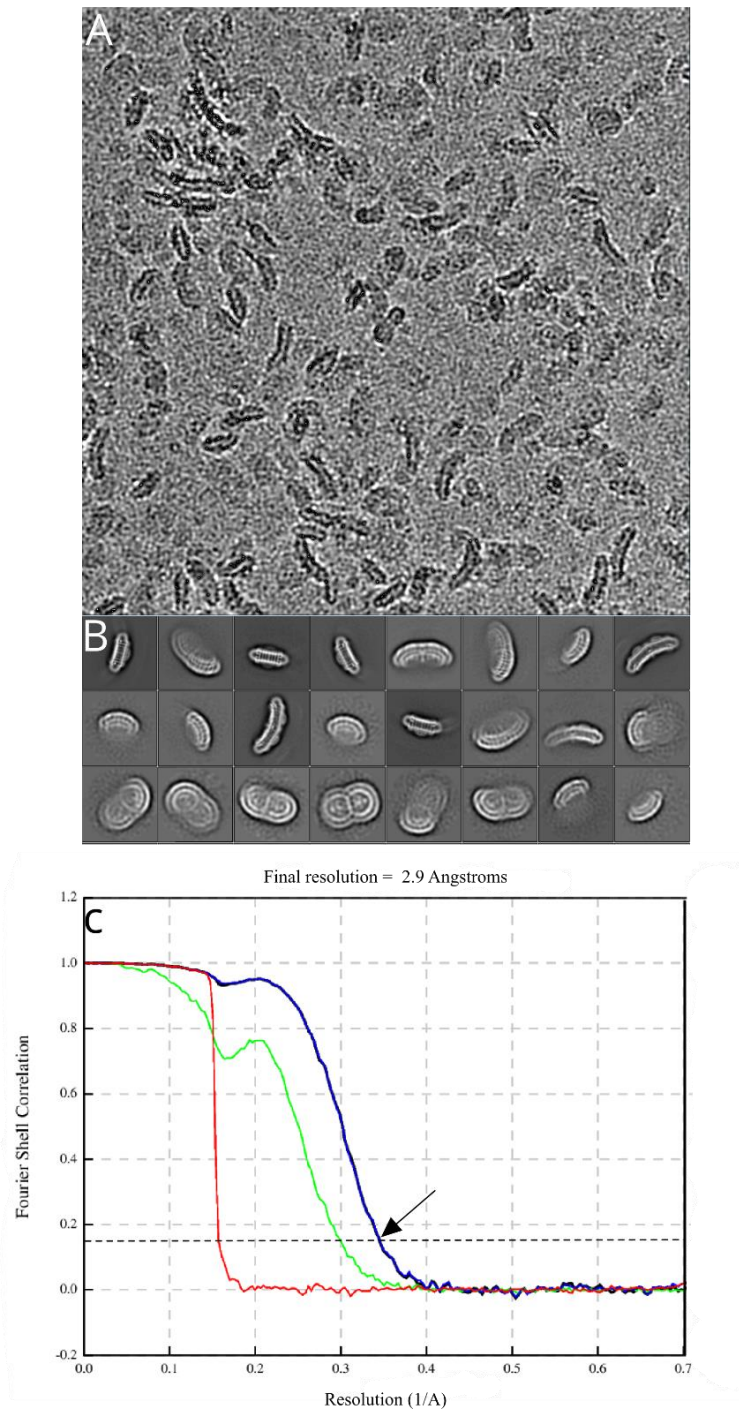

**Figure S1.** Cryo-EM image of RC-LH1-PufX dimer complexes from *Rba. sphaeroides* and resolution calculation of 3D map. (A) A motion corrected cryo-EM image of RC-LH1-PufX dimers embedded in vitrified water. The image was 20 Å low-pass filtered with a sigma contrast of 3.0 applied. The image size is 266 x 266 nm. (B) Selected 2D classes, showing different orientations of the RC-LH1-PufXYZ molecules in the vitrified ice layer. The box size is 30.5 nm. (C) Fourier shell correlation (FSC) curves of the CTF corrected (*black line*), masked (*blue solid line*), unmasked (*green line*), and phase randomized (*red line*) half-maps with C2 symmetry imposed. The dashed line shows 0.143 FSC, with an arrow pointing to the global resolution of the map at 2.9 Å.

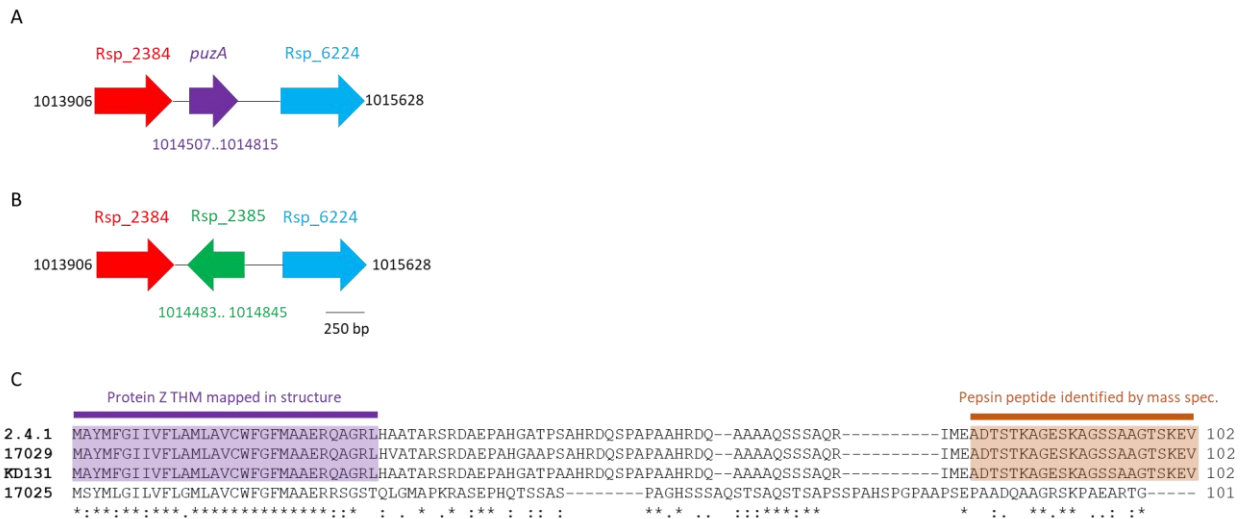

**Figure S2.** The protein-Z polypeptide. (A-B) The 1013906..1015628 region of the *Rba. sphaeroides* 2.4.1 genome showing the position of the putative '*puzA*' gene (A), which we predict is wrongly annotated as Rsp\_2385 in the original genome sequence (B). Rsp\_2384 encodes a putative stress protein and Rsp\_6224 a putative membrane protein (phosphate-starvation-inducible E). (C) Multiple sequence alignment of the putative protein-Z homologs identified in the four *Rba. sphaeroides* (now also referred to as *Cereibacter sphaeroides*) strains in the KEGG database: *Rba. sphaeroides* 2.4.1, *Rba. sphaeroides* strain ATCC 17029, *Rba. sphaeroides* strain ATCC 17025 and *Rba. sphaeroides* strain KD131. The purple bar indicates the position of the conserved N-terminal region observed in our structure. The orange bar indicates the C-terminal pepsin peptide identified by mass spectrometry analysis of isolated RC-LH1 core complexes

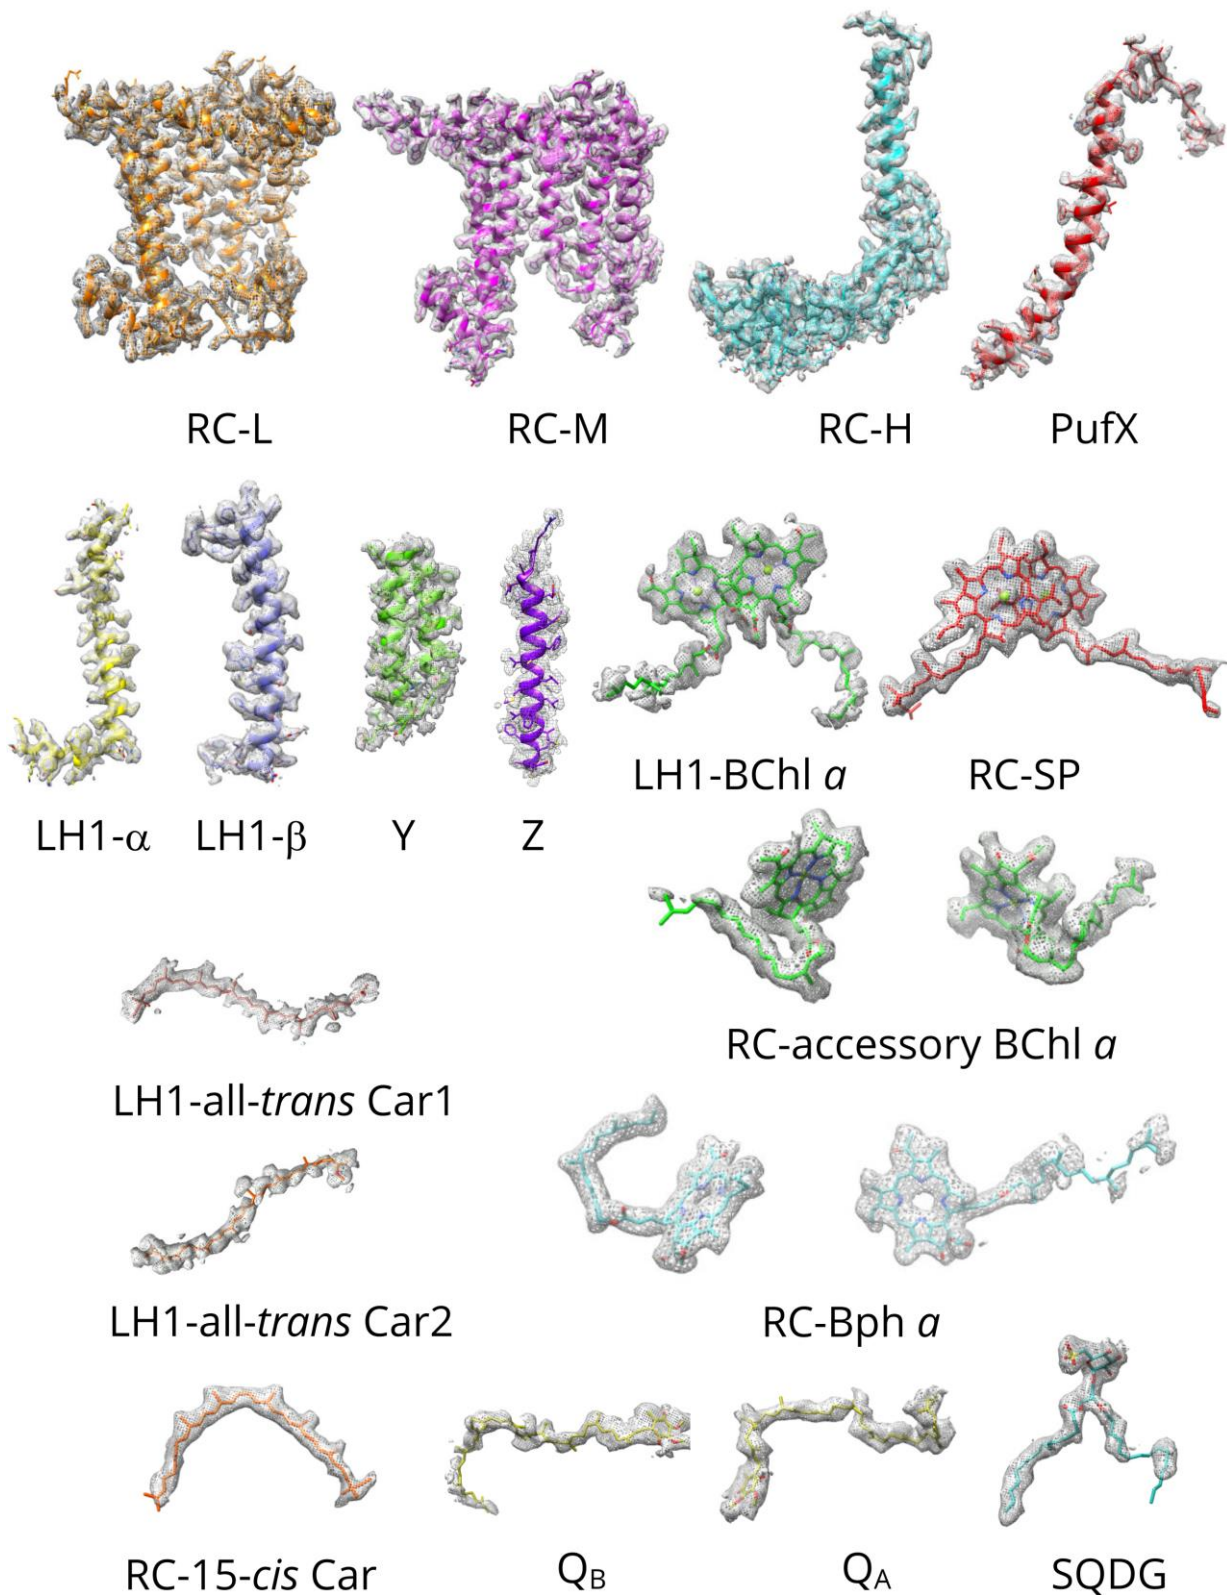

**Figure S3.** Cryo-EM densities and structural models of polypeptides and pigments in the dimeric *Rba. sphaeroides* RC-LH1-PufX complex. Atomic models of components of the complexes are fitted into their respective density maps, taken from the final refined model. RC-SP are the reaction centre special pair of BChls. Y and Z are protein-Y and protein-Z, respectively. RC-LH1-PufX has C2 symmetry; only the components in a monomer are shown. The colour code is the same as in Fig. 1.



A

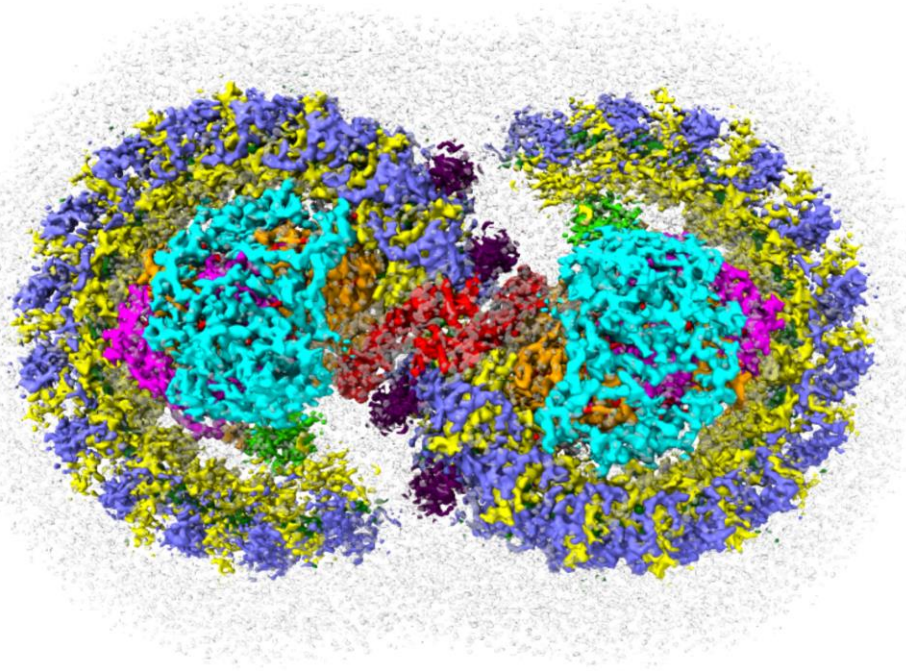

B

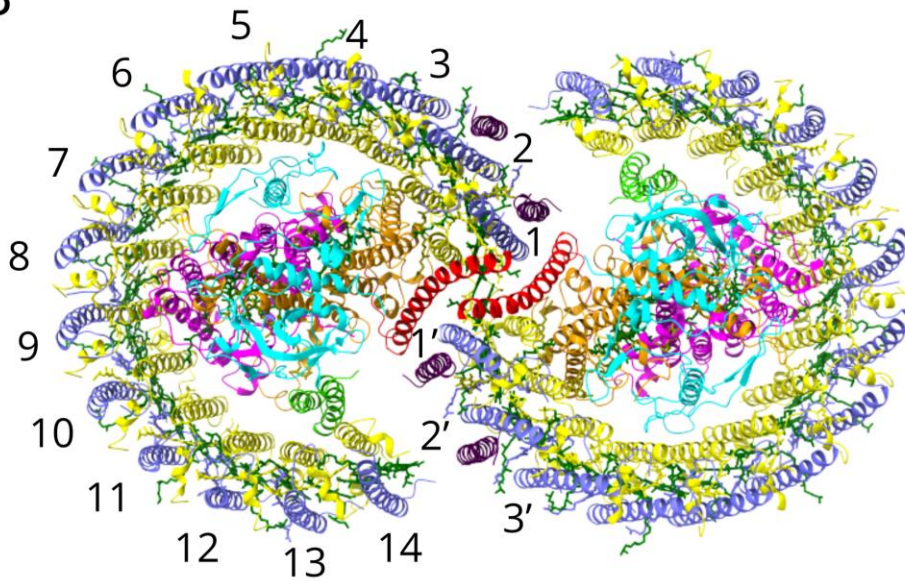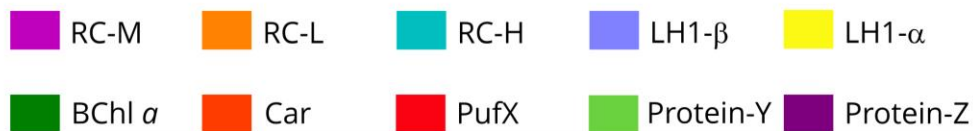

**Figure S4.** Cryo-EM structure of the dimeric RC-LH1 complex from *Rba. sphaeroides*. (A) View of the cytoplasmic face of the density map of the complex. (B) View as in (A), as a ribbon model; the LH1 subunits are numbered on the left hand side and subunits 1'-3' on the other side. Subunits and cofactors are coloured as in the key at the bottom of the figure. Detergent and other disordered molecules are in grey.



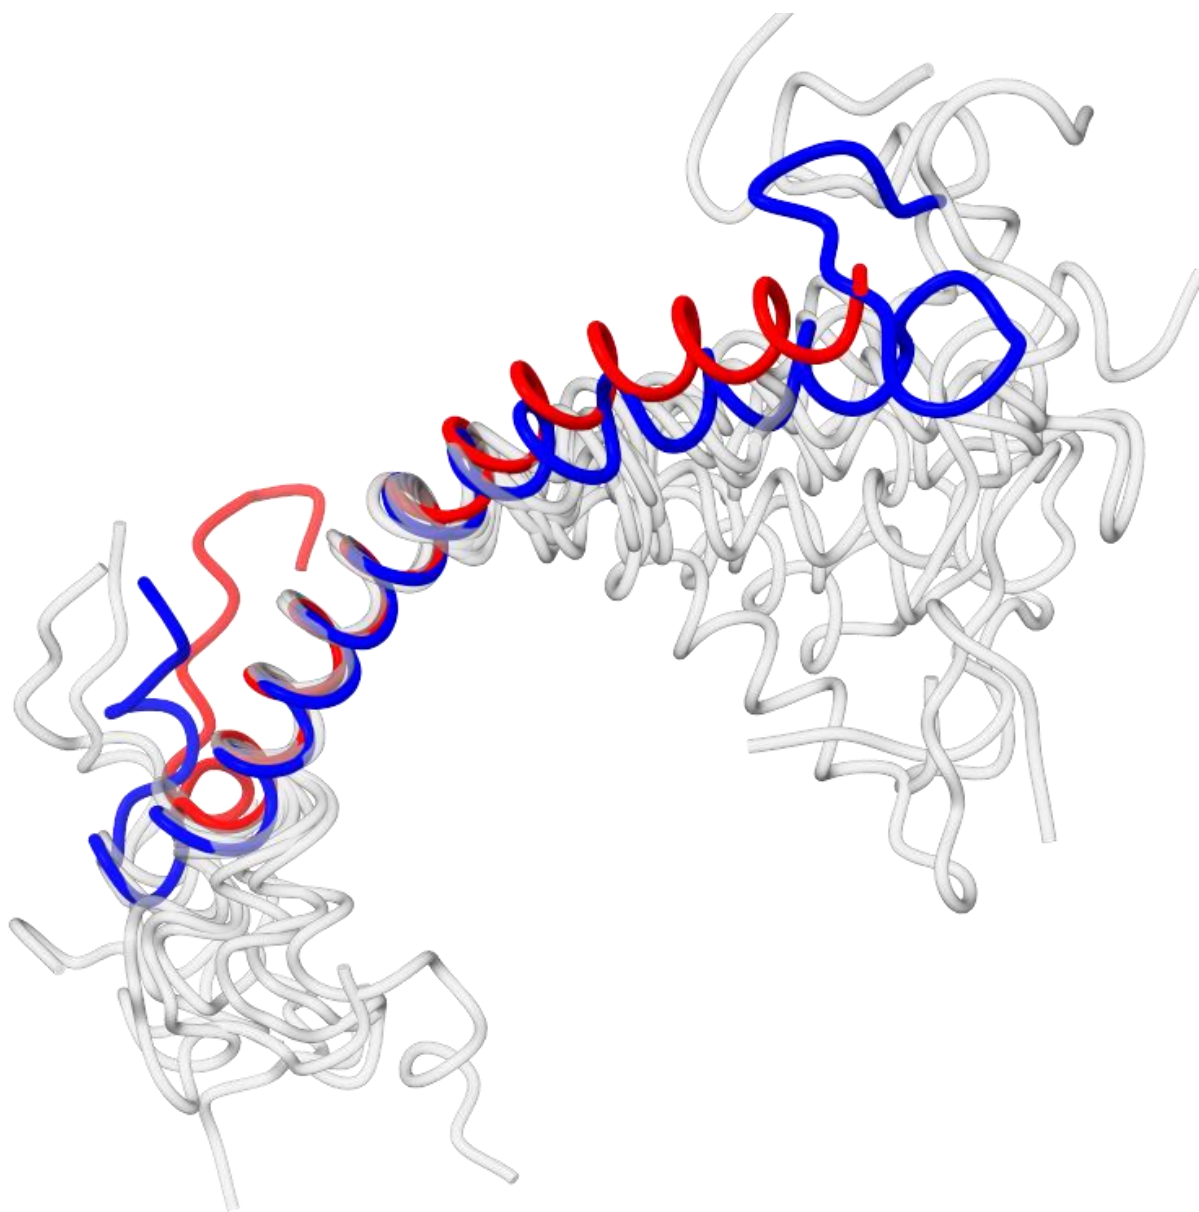

**Figure S6.** Overlaid NMR solution structures of PufX (grey) aligned to the full length of the transmembrane helix. The solution structure coloured in blue aligns to a limited degree with the PufX assembled within the dimer complex (red).

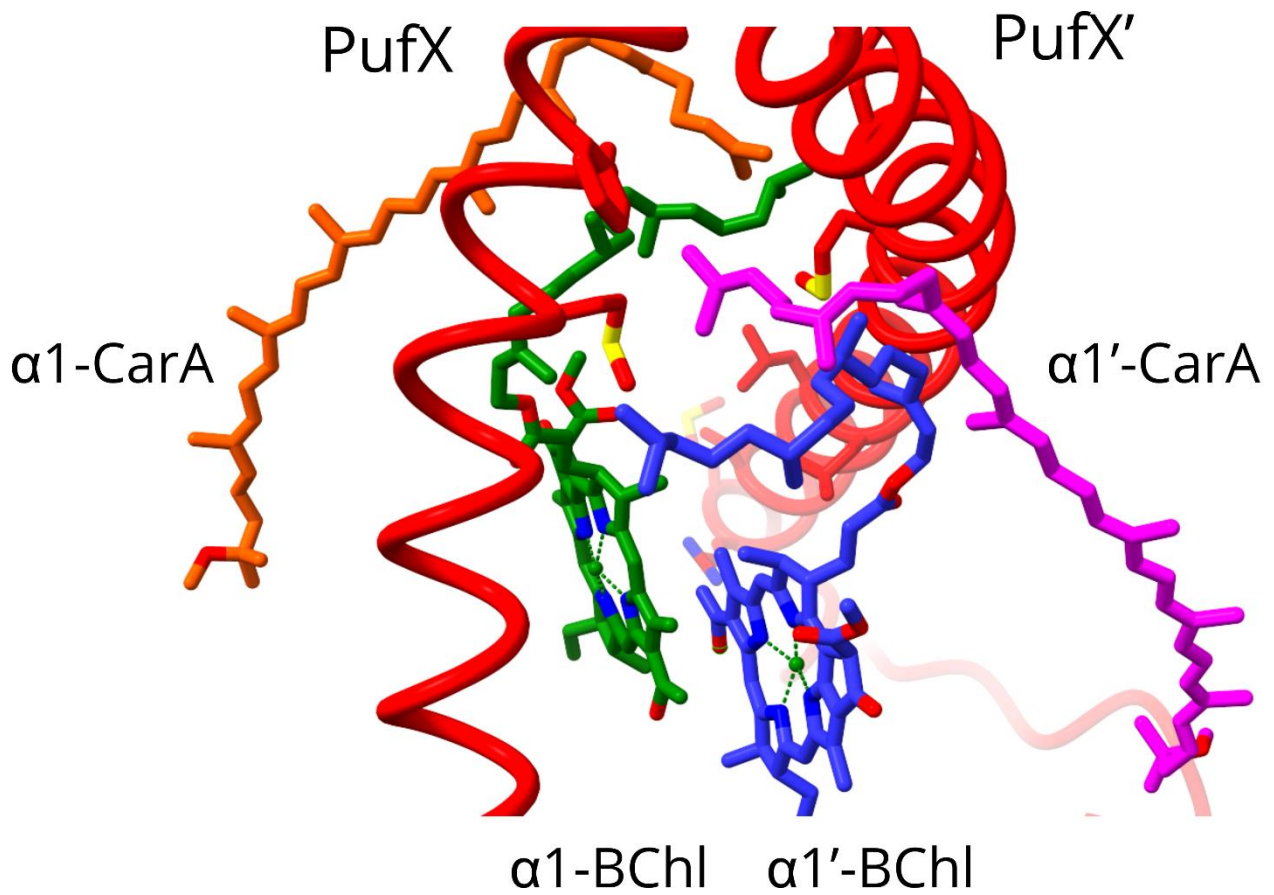

**Fig. S7.** The two central carotenoids and BChls at the dimer interface. The two PufX polypeptides incline towards each other, forming an arch that constrains and bows the CarA carotenoids, as well as the phytol tails of the two central BChls,  $\alpha 1$ -BChl and  $\alpha 1'$ -BChl.

**Table S1. Cryo-EM data acquisition, model refinement and validation statistics.**

|                                                                       |                              |
|-----------------------------------------------------------------------|------------------------------|
| <b>Protein source</b>                                                 | Photosynthetic bacterium     |
| <b>Data collection and processing</b>                                 |                              |
| Microscope                                                            | ThermoFisher Titan Krios G3i |
| Voltage (kV)                                                          | 300                          |
| Camera                                                                | Falcon 4                     |
| Energy filter                                                         | No                           |
| Energy filter slit width                                              | No                           |
| Magnification                                                         | 120,000                      |
| Defocus range ( $\mu\text{m}$ )                                       | -0.8 to -2.2                 |
| Mean defocus ( $\mu\text{m}$ )                                        | -1.8                         |
| Pixel size ( $\text{\AA}$ )                                           | 0.65                         |
| Electron flux ( $\text{e}^-/\text{\AA}^2/\text{s}$ )                  | 3.71                         |
| Electron fluence ( $\text{e}^-/\text{\AA}^2$ )                        | 45.36                        |
| Exposure time (sec/frame)                                             | 0.29                         |
| Electron fluence per frame ( $\text{e}^-/\text{\AA}^2/\text{frame}$ ) | 1.08                         |
| Number of frames per movie                                            | 42                           |
| Number of movies used                                                 | 5058                         |
| Initial no. particle images                                           | 223786                       |
| Final no. particle images                                             | 58945                        |
| Symmetry imposed                                                      | C2                           |
| Local resolution range                                                | 2.8 to 3.1                   |
| Resolution of unmasked reconstruction ( $\text{\AA}$ , FSC=0.143)     | 3.3                          |
| Resolution of masked reconstruction ( $\text{\AA}$ , FSC=0.143)       | 2.9                          |
| Specimen temperature                                                  | ~80K                         |
| Particle box size                                                     | (512 px) <sup>2</sup>        |
| <b>Refinement and validation</b>                                      |                              |
| Refinement package                                                    | COOT, ISOLDE, PHENIX         |
| Initial model                                                         | PDB 7PIL                     |
| Model resolution ( $\text{\AA}$ , FSC=0.5)                            | 2.9                          |
| Map sharpening B factor ( $\text{\AA}^2$ )                            | -90.45                       |
| <b>Model composition</b>                                              |                              |
| Non-hydrogen atoms                                                    | 45992                        |
| Protein residues                                                      | 4698                         |
| Molecular weight (kD)                                                 | 646.1                        |
| Protein B factor ( $\text{\AA}^2$ )                                   | 21.75                        |
| <b>RMS deviations</b>                                                 |                              |
| Bond length ( $\text{\AA}$ )                                          | 0.0042                       |
| Bond angle ( $^\circ$ )                                               | 0.82                         |
| <b>Validation</b>                                                     |                              |
| MolProbity score                                                      | 0.97                         |
| Clashscore                                                            | 1.63                         |
| Rotamer outliers (%)                                                  | 0.36                         |
| EMRinger score                                                        | 4.80                         |
| Cb deviations (%)                                                     | 0.00                         |
| CaBLAM outliers (%)                                                   | 1.0                          |
| <b>Ramachandran plot</b>                                              |                              |
| Favoured (%)                                                          | 97.75                        |
| Allowed (%)                                                           | 1.89                         |
| Disallowed (%)                                                        | 0.36                         |
| Ramachandran Z-score                                                  | -0.58                        |
| <b>PDB ID</b>                                                         | 7PQD                         |
| <b>EMDB ID</b>                                                        | EMD-13590                    |



**Table S2. A list of hydrogen bonds the RC-LH1 dimer complex, relating to Fig. 2B, Fig. 3D, E and Fig. 4B.**

| Residue 1                                     | Atom 1   | Residue 2 | Atom 2   | Distance (Å) |
|-----------------------------------------------|----------|-----------|----------|--------------|
| <b>LH1-Protein Z interactions (Fig. 2B)</b>   |          |           |          |              |
| Z1-Tyr3                                       | OH (sc)  | β1-Tyr43  | O (bb)   | 3.0          |
| Z1-Cys17                                      | SG (sc)  | β1-Ser32  | OG (sc)  | 3.7          |
| Z1-Glu25                                      | OE2 (sc) | X-Arg20   | NH2 (sc) | 2.9          |
| Z1-Ala28                                      | O (bb)   | X-Lys16   | NZ (bb)  | 3.1          |
| <b>Inter-monomer interactions (Fig. 3D,E)</b> |          |           |          |              |
| α1-Leu44                                      | O (bb)   | β1'-Trp45 | NE1 (sc) | 3.3          |
| X-Arg53                                       | NH1 (sc) | β1'-Ile44 | O (bb)   | 2.8          |
| <b>SQDG interactions (Fig. 4B)</b>            |          |           |          |              |
| L-Leu75                                       | N (bb)   | SQD100    | O2       | 3.1          |
| L-Leu75                                       | N (bb)   | SQD100    | O3       | 3.3          |
| L-Gly140                                      | O (bb)   | SQD100    | O3       | 2.9          |
| L-Gly140                                      | O (bb)   | SQD100    | O4       | 3.6          |
| X-Arg49                                       | NH1 (sc) | SQD100    | O7       | 2.8          |
| X-Arg53                                       | NH2 (sc) | SQD100    | O7       | 3.0          |
| X-Arg53                                       | NE (sc)  | SQD100    | O8       | 3.3          |

The atom labels refer to those used in the accompanying structure file (PDB: 7PQD). bb – backbone; sc – sidechain.
